# Supplementary material
Source: PubMed Central journal article supplement (PMC9232971)

**Consort 2010 Flow Diagram**  
data from figure 1 of parent paper<sup>6</sup>

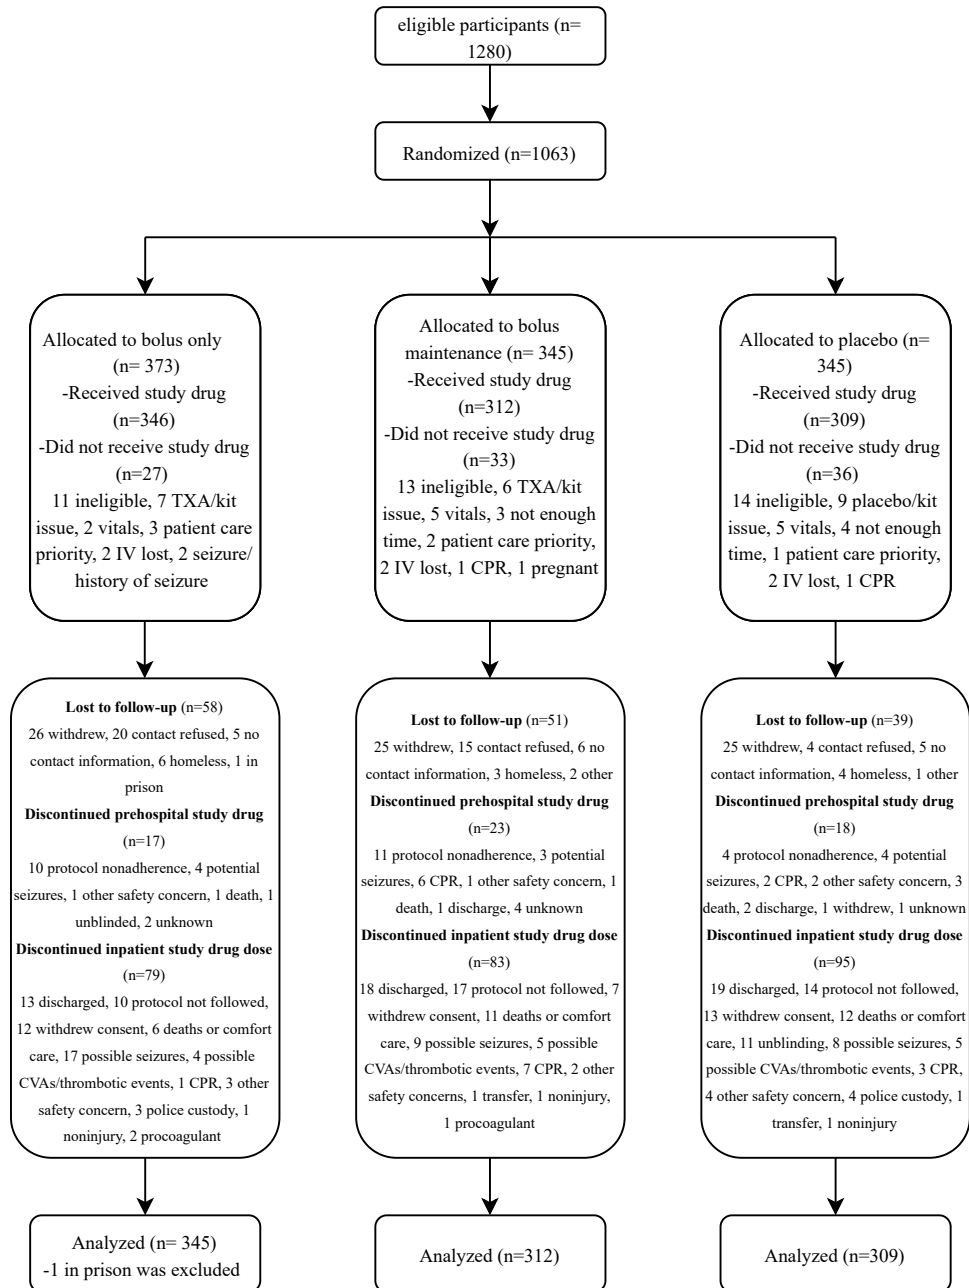

Supplement: NIHMS1792701-supplement-Supplemental_Data_File___doc___tif__pdf__etc___2.pdf [file NIHMS1792701-supplement-Supplemental_Data_File___doc___tif__pdf__etc___2.pdf]
